# Supplementary material for: Combining a wavelet change point and the Bayes factor for analysing chromosomal interaction data
Source: Royal Society of Chemistry journal article supplement (doi:10.1039/c4mb00142g), 2014-03-20
Supplement: c4mb00142g2.pdf [file c4mb00142g2.pdf]

Table ST1. Average number of additional change points after introducing a chromosomal aberration.

| size | deletion | duplication | translocation |
|------|----------|-------------|---------------|
| 3    | 2.33     | 1.65        | 1.01          |
| 2    | 2.28     | 2.35        | 1.09          |
| 1    | 2.24     | 2.43        | 0.85          |
| 0.75 | 2.83     | 2.70        | 0.79          |
| 0.5  | 3.25     | 3.20        | 1.14          |
| 0.4  | 3.38     | 3.21        | 1.03          |
| 0.3  | 3.38     | 3.25        | 1.08          |
| 0.2  | 3.35     | 3.20        | 1.15          |
| 0.1  | 2.85     | 2.96        | 1.16          |
| 0.05 | 1.74     | 2.31        | 0.90          |
| 0.01 | 0.33     | 0.35        | 0.32          |
