# Supplementary material for: Combining a wavelet change point and the Bayes factor for analysing chromosomal interaction data
Source: Royal Society of Chemistry journal article supplement (doi:10.1039/c4mb00142g), 2014-03-20
Supplement: c4mb00142g3.pdf [file c4mb00142g3.pdf]

Table ST2. Region pairs that were detected as differentially interacting when comparing (corrected) replicates of IMR90 and ESC cell lines. The regions' coordinates are given (chromosome name, start and end positions) along with the associated BF value (the maximal value across all cross comparisons). In addition we provide the number of cross comparisons (between the different replicates) in which the change was detected as significant (Votes). The top 2 differentially interacting regions are highlighted (in bold). BF, Bayes Factor.

| Chr1         | Start1          | End1            | Chr2         | Start2          | End2            | BF              | Votes    |
|--------------|-----------------|-----------------|--------------|-----------------|-----------------|-----------------|----------|
| <b>chr11</b> | <b>84000000</b> | <b>84999999</b> | <b>chr17</b> | <b>30000000</b> | <b>30999999</b> | <b>46.36672</b> | <b>1</b> |
| <b>chr1</b>  | <b>91000000</b> | <b>91999999</b> | <b>chrX</b>  | <b>1.08E+08</b> | <b>1.09E+08</b> | <b>41.13984</b> | <b>2</b> |
| chr1         | 1.62E+08        | 1.63E+08        | chr16        | 69000000        | 69999999        | 17.59863        | 2        |
| chr1         | 91000000        | 91999999        | chr12        | 34000000        | 34999999        | 15.17791        | 2        |
| chr13        | 26000000        | 26999999        | chr14        | 87000000        | 87999999        | 13.9271         | 2        |
| chr16        | 7000000         | 7999999         | chr6         | 1               | 999999          | 12.37341        | 3        |
| chr1         | 1.74E+08        | 1.75E+08        | chr16        | 69000000        | 69999999        | 11.27555        | 2        |
| chr19        | 24000000        | 24999999        | chr5         | 62000000        | 62999999        | 10.9823         | 2        |
| chr19        | 24000000        | 24999999        | chr5         | 63000000        | 63999999        | 10.44883        | 2        |
| chr21        | 18000000        | 18999999        | chr4         | 1.9E+08         | 1.91E+08        | 10.33765        | 1        |
| chr19        | 24000000        | 24999999        | chr5         | 61000000        | 61999999        | 10.20545        | 2        |
| chr1         | 1.72E+08        | 1.73E+08        | chr16        | 69000000        | 69999999        | 10.15263        | 1        |
| chr1         | 1.66E+08        | 1.67E+08        | chr16        | 69000000        | 69999999        | 10.12206        | 2        |
| chr1         | 1.67E+08        | 1.68E+08        | chr16        | 69000000        | 69999999        | 10.12206        | 3        |
| chr19        | 24000000        | 24999999        | chr5         | 59000000        | 59999999        | 10.03875        | 1        |
| chr19        | 24000000        | 24999999        | chr5         | 60000000        | 60999999        | 10.03875        | 2        |
| chr19        | 24000000        | 24999999        | chr5         | 67000000        | 67999999        | 9.912153        | 2        |
| chr21        | 19000000        | 19999999        | chr4         | 1.9E+08         | 1.91E+08        | 9.772827        | 2        |
| chr1         | 1.75E+08        | 1.76E+08        | chr16        | 69000000        | 69999999        | 9.622689        | 3        |
| chr15        | 19000000        | 19999999        | chr21        | 9000000         | 9999999         | 9.414303        | 1        |
| chr4         | 67000000        | 67999999        | chr7         | 61000000        | 61999999        | 9.359272        | 1        |
| chr1         | 1.69E+08        | 1.7E+08         | chr16        | 69000000        | 69999999        | 9.241399        | 2        |
| chr6         | 62000000        | 62999999        | chr7         | 61000000        | 61999999        | 9.172505        | 1        |
| chr1         | 1.63E+08        | 1.64E+08        | chr16        | 69000000        | 69999999        | 9.057243        | 1        |
| chr1         | 1.56E+08        | 1.57E+08        | chr16        | 69000000        | 69999999        | 9.015332        | 1        |
| chr1         | 1.21E+08        | 1.22E+08        | chr5         | 45000000        | 45999999        | 8.935408        | 2        |
| chr3         | 77000000        | 77999999        | chr6         | 57000000        | 57999999        | 8.924011        | 1        |
| chr15        | 19000000        | 19999999        | chr16        | 33000000        | 33999999        | 8.873315        | 1        |
| chr12        | 13000000        | 13999999        | chr4         | 67000000        | 67999999        | 8.627406        | 2        |
| chr21        | 20000000        | 20999999        | chr4         | 1.9E+08         | 1.91E+08        | 8.528016        | 3        |
| chr16        | 6000000         | 6999999         | chr6         | 1               | 999999          | 8.435892        | 2        |
| chr16        | 13000000        | 13999999        | chr6         | 1               | 999999          | 8.330147        | 2        |
| chr19        | 24000000        | 24999999        | chr5         | 58000000        | 58999999        | 8.208523        | 2        |
| chr20        | 53000000        | 53999999        | chr9         | 67000000        | 67999999        | 8.201227        | 1        |
| chr21        | 30000000        | 30999999        | chr4         | 1.9E+08         | 1.91E+08        | 8.112089        | 2        |
| chr1         | 1.68E+08        | 1.69E+08        | chr16        | 69000000        | 69999999        | 8.064983        | 3        |
| chr21        | 19000000        | 19999999        | chr9         | 67000000        | 67999999        | 8.04476         | 2        |
| chr19        | 24000000        | 24999999        | chr5         | 66000000        | 66999999        | 8.024014        | 1        |
| chr16        | 33000000        | 33999999        | chr20        | 53000000        | 53999999        | 7.98145         | 1        |
| chr3         | 1.18E+08        | 1.19E+08        | chr6         | 57000000        | 57999999        | 7.758112        | 1        |
| chr16        | 5000000         | 5999999         | chr6         | 1               | 999999          | 7.623317        | 2        |
| chr13        | 53000000        | 53999999        | chr21        | 10000000        | 10999999        | 7.588509        | 1        |
| chr16        | 33000000        | 33999999        | chr17        | 42000000        | 42999999        | 7.507705        | 1        |
| chr1         | 1.41E+08        | 1.42E+08        | chr4         | 45000000        | 45999999        | 7.484834        | 1        |
| chr12        | 17000000        | 17999999        | chr4         | 67000000        | 67999999        | 7.45981         | 2        |
| chr14        | 25000000        | 25999999        | chr4         | 1.9E+08         | 1.91E+08        | 7.430886        | 1        |

|       |          |          |       |          |          |          |   |
|-------|----------|----------|-------|----------|----------|----------|---|
| chr21 | 40000000 | 40999999 | chr4  | 1.9E+08  | 1.91E+08 | 7.3916   | 2 |
| chr1  | 1.64E+08 | 1.65E+08 | chr16 | 69000000 | 69999999 | 7.389136 | 1 |
| chr1  | 1.41E+08 | 1.42E+08 | chr4  | 47000000 | 47999999 | 7.379373 | 1 |
| chr19 | 24000000 | 24999999 | chr5  | 57000000 | 57999999 | 7.327549 | 1 |
| chr1  | 1.21E+08 | 1.22E+08 | chr19 | 34000000 | 34999999 | 7.272698 | 1 |
| chr21 | 31000000 | 31999999 | chr4  | 1.9E+08  | 1.91E+08 | 7.208303 | 1 |
| chr13 | 34000000 | 34999999 | chr21 | 10000000 | 10999999 | 7.148562 | 1 |
| chr3  | 1.46E+08 | 1.47E+08 | chr6  | 57000000 | 57999999 | 7.131365 | 1 |
| chr16 | 33000000 | 33999999 | chr20 | 40000000 | 40999999 | 7.126427 | 1 |
| chr12 | 69000000 | 69999999 | chr4  | 67000000 | 67999999 | 6.978656 | 2 |
| chr13 | 69000000 | 69999999 | chr4  | 1.9E+08  | 1.91E+08 | 6.89874  | 1 |
| chr3  | 1.19E+08 | 1.2E+08  | chr6  | 57000000 | 57999999 | 6.867292 | 2 |
| chr4  | 1.9E+08  | 1.91E+08 | chr5  | 46000000 | 46999999 | 6.862155 | 1 |
| chr15 | 19000000 | 19999999 | chr9  | 67000000 | 67999999 | 6.842531 | 1 |
| chr2  | 1.32E+08 | 1.33E+08 | chr20 | 40000000 | 40999999 | 6.837236 | 2 |
| chr19 | 32000000 | 32999999 | chr21 | 19000000 | 19999999 | 6.833563 | 2 |
| chr16 | 25000000 | 25999999 | chr6  | 1        | 999999   | 6.810314 | 1 |
| chr3  | 1        | 999999   | chr7  | 61000000 | 61999999 | 6.663006 | 1 |
| chr12 | 16000000 | 16999999 | chr4  | 67000000 | 67999999 | 6.616876 | 1 |
| chr3  | 1.32E+08 | 1.33E+08 | chr6  | 57000000 | 57999999 | 6.609255 | 2 |
| chr17 | 22000000 | 22999999 | chr7  | 61000000 | 61999999 | 6.525028 | 1 |
| chr12 | 41000000 | 41999999 | chr4  | 67000000 | 67999999 | 6.512667 | 1 |
| chr12 | 31000000 | 31999999 | chr4  | 67000000 | 67999999 | 6.506781 | 1 |
| chr1  | 1.61E+08 | 1.62E+08 | chr16 | 69000000 | 69999999 | 6.481288 | 1 |
| chr12 | 61000000 | 61999999 | chr4  | 67000000 | 67999999 | 6.447913 | 2 |
| chr6  | 57000000 | 57999999 | chr7  | 61000000 | 61999999 | 6.427203 | 1 |
| chr1  | 1.73E+08 | 1.74E+08 | chr16 | 69000000 | 69999999 | 6.424035 | 2 |
| chr21 | 18000000 | 18999999 | chr9  | 67000000 | 67999999 | 6.418103 | 1 |
| chr21 | 22000000 | 22999999 | chr4  | 1.9E+08  | 1.91E+08 | 6.400423 | 1 |
| chr15 | 25000000 | 25999999 | chr21 | 9000000  | 9999999  | 6.375954 | 1 |
| chr15 | 18000000 | 18999999 | chr21 | 9000000  | 9999999  | 6.350599 | 1 |
| chr19 | 24000000 | 24999999 | chr5  | 65000000 | 65999999 | 6.227969 | 1 |
| chr3  | 1.17E+08 | 1.18E+08 | chr6  | 57000000 | 57999999 | 6.209266 | 1 |
| chr12 | 14000000 | 14999999 | chr4  | 67000000 | 67999999 | 6.202226 | 1 |
| chr13 | 53000000 | 53999999 | chr4  | 1.9E+08  | 1.91E+08 | 6.198277 | 1 |
| chr3  | 1.41E+08 | 1.42E+08 | chr6  | 57000000 | 57999999 | 6.18264  | 1 |
| chr13 | 25000000 | 25999999 | chr21 | 10000000 | 10999999 | 6.179253 | 1 |
| chr12 | 53000000 | 53999999 | chr4  | 67000000 | 67999999 | 6.12365  | 1 |
| chr3  | 1.22E+08 | 1.23E+08 | chr6  | 57000000 | 57999999 | 6.104072 | 1 |
