# Supplementary material for: Combining a wavelet change point and the Bayes factor for analysing chromosomal interaction data
Source: Royal Society of Chemistry journal article supplement (doi:10.1039/c4mb00142g), 2014-03-20
Supplement: c4mb00142g6.pdf [file c4mb00142g6.pdf]

## Supplementary Text T3

Given 2 contact maps  $M_1$  and  $M_2$ , denote  $x_{ij}^r$  to be  $M_r[i,j]$ , the interaction frequency between loci  $i$  and  $j$  in the contact map

$M_r$ ,  $r = 1, 2$ . The Bayes Factor of loci  $i$  and  $j$ , denoted as  $BF_{ij}$ , is then:

$$(1) BF_{ij} = \frac{P(x_{ij}^1, x_{ij}^2 | H_1)}{P(x_{ij}^1, x_{ij}^2 | H_0)} = \frac{P(x_{ij}^1) P(x_{ij}^2)}{P(x_{ij}^1, x_{ij}^2)}$$

and  $P(x_{ij}^1, \dots, x_{ij}^r)$  is the marginal likelihood of the data.

We assume here that corrected and standardized  $x_{ij}^r$  come from a Gaussian distribution with a Gamma prior, where both mean ( $\mu$ ) and variance ( $\sigma^2$ ) vary. Under this assumption the marginal likelihood can be written as:

$$(2) P(x_{ij}^1, \dots, x_{ij}^n) = \int \prod_{r=1}^n [p(x_{ij}^r | \mu, \sigma^2)] p(\mu | \mu_0, \sigma_0^2) d\mu$$

Using a close form of a Normal-Gamma prior [1-2], Eq. 2 can be re-written as (notation used as in [2]):

$$(3) P(x_{ij}^1, \dots, x_{ij}^n) = \frac{\Gamma(\alpha_n) \beta_0^{\alpha_0}}{\Gamma(\alpha_0) \beta_n^{\alpha_n}} \left(\frac{k_0}{k_n}\right)^{\frac{1}{2}} (2\pi)^{-\frac{n}{2}}$$

And

$$k_0 = \frac{2s^2}{\sigma_0^2}; \beta_0 = \frac{1}{2} \sigma_0^2; \alpha_0 = 1.0$$

$$k_n = k_0 + n; \beta_n = \beta_0 + \frac{1}{2} (\sum_{l=1}^n x_{ij}^l - \bar{x}) + \frac{k_0 n (\bar{x} - \mu_0)^2}{2(k_0 + n)}; \alpha_n = \alpha_0 + \frac{n}{2}$$

Where  $\bar{x}$  and  $s^2$  are the mean and variance of  $x_{ij}^r$  respectively,  $\mu_0$  and  $\sigma_0^2$  are the prior mean and variance (correspondingly) and  $\Gamma$  is the gamma function. Here, we have calculated separated  $\mu_0$  and  $\sigma_0^2$  for *cis*, *trans* and *self* interactions, by taking the mean and variance of all the relevant interactions in  $M_1$  and  $M_2$ , i.e:

$$(4) \mu_{0\_T} = \text{mean}(x_{ij}^r); \sigma_{0\_T}^2 = \text{variance}(x_{ij}^r), r=1,2 \text{ and the interaction between loci } i \text{ and } j \text{ is of type } T (=self, cis, trans)$$

The prior mean and variance in Eq. 2 are then selected based on the type of interaction (*cis*, *trans* or *self*) of loci  $i$  and  $j$  as calculated in Eq.4.

Finally, putting Eq. 1 - 3 together gives:

$$(5) BF_{ij} = \frac{\frac{\Gamma(\alpha_1)}{\Gamma(\alpha_0)} (2\pi)^{-1} \frac{\beta_0^{\alpha_0}}{\beta_{1,1}^{\alpha_1} \beta_{1,2}^{\alpha_1}} \frac{k_0}{k_1}}{\frac{\Gamma(\alpha_2)}{\Gamma(\alpha_0)} (2\pi)^{-1} \frac{\beta_0^{\alpha_0}}{\beta_2^{\alpha_2}} \left(\frac{k_0}{k_2}\right)^{\frac{1}{2}}} = \frac{\Gamma(\alpha_1)^2 (\beta_0^{\alpha_0}) \beta_2^{\alpha_2} \frac{k_0}{k_1}}{\Gamma(\alpha_2) (\beta_{1,1}^{\alpha_1}) \beta_{1,2}^{\alpha_1} \left(\frac{k_0}{k_2}\right)^{\frac{1}{2}}}$$

Where  $\beta_{1,r}$  is the  $\beta_1$  value computed for  $x_{ij}^r$ .

## References

1. DeGroot MH: *Optimal Statistical Decisions*. New York: McGraw-Hill; 1970.
2. Murphy KP: **Conjugate Bayesian analysis of the Gaussian distribution**. Technical report. University of British Columbia; 2007.
